# Supplementary material
Source: PubMed Central journal article supplement (PMC4914627)
Supplement: AAC.01749-15_zac007165278so1.pdf [file AAC.01749-15_zac007165278so1.pdf]

**SUPPLEMENTAL TABLE 1.** Treatment indications of short-term FQ or non-FQ use in patients who received short-term (< 7 days) FQ or non-FQ antibiotics

|                                                                                 | FQ use (n=23)   |                      | Non-FQ use (n=30) |                      |
|---------------------------------------------------------------------------------|-----------------|----------------------|-------------------|----------------------|
|                                                                                 | No. of patients | No. of dead patients | No. of patients   | No. of dead patients |
| <b>Early switch to the first line anti-TB drugs</b>                             | 8               | 0                    | 11                | 0                    |
| <b>Empirical therapy for other infection</b>                                    | 6               | 1                    | 4                 | 0                    |
| <b>Rapid fatal due to progression of pneumonia during empirical antibiotics</b> | 4               | 4                    | 1                 | 1                    |
| <b>Wrong prescription in emergency department</b>                               | 3               | 0                    | 2                 | 0                    |
| <b>Hopeless discharge</b>                                                       | 1               | 1                    | 0                 | 0                    |
| <b>Perioperative antibiotics</b>                                                | 1 <sup>a</sup>  | 0                    | 12 <sup>b</sup>   | 0                    |
| <b>Total</b>                                                                    | 30              | 1                    | 30                | 1                    |

<sup>a</sup> Perioperative prophylaxis for cardiac window operation.

<sup>b</sup> The 12 patients who received short-term non-FQ for perioperative antibiotics underwent the scheduled cancer surgery (lung cancer (n=3), hepatocellular carcinoma (n=2), urogenital cancer (n=1)) and the scheduled procedure (urogenital procedure (n=3), dental problem (n=1), CNS problem (n=1), lymph node excision (n=1)).

**SUPPLEMENTAL TABLE 2.** Demographics, clinical characteristics, treatments, and outcomes of the 57 immunocompromised patients who did not received empirical anti-TB treatment (missed TB group)

| Variables                                         | Long-term FQ                   |                                         | P     |
|---------------------------------------------------|--------------------------------|-----------------------------------------|-------|
|                                                   | group <sup>a</sup><br>(n = 15) | The comparator <sup>b</sup><br>(n = 42) |       |
| <b>Demographics</b>                               |                                |                                         |       |
| Age, mean years ± SD                              | 66 ± 11                        | 64 ± 13                                 | 0.59  |
| Male sex                                          | 10 (67)                        | 27 (64)                                 | 0.87  |
| <b>Clinical diagnosis</b>                         |                                |                                         |       |
| Pulmonary TB                                      | 13 (87)                        | 38 (91)                                 | 0.65  |
| Extrapulmonary TB                                 | 2 (13)                         | 4 (10)                                  | 0.65  |
| Disseminated TB                                   | 0 (0)                          | 0 (0)                                   | NA    |
| <b>Underlying disease</b>                         |                                |                                         |       |
| Solid tumor                                       | 10 (67)                        | 36 (86)                                 | 0.14  |
| Transplantation                                   | 2 (13)                         | 1 (2)                                   | 0.17  |
| Hematologic malignancy                            | 2 (13)                         | 2 (5)                                   | 0.28  |
| Chronic renal failure                             | 0 (0)                          | 1 (2)                                   | >0.99 |
| Liver cirrhosis                                   | 3 (20)                         | 4 (10)                                  | 0.37  |
| Connective tissue disease                         | 1 (7)                          | 3 (7)                                   | >0.99 |
| HIV infection                                     | 0 (0)                          | 0 (0)                                   | NA    |
| <b>Use of immunosuppressive agent (≤ 1 month)</b> | 7 (47)                         | 11 (26)                                 | 0.20  |
| <b>Atypical chest image<sup>c</sup></b>           | 11/13 (85)                     | 28/38 (74)                              | 0.70  |
| <b>Anti-TB drug susceptibility test</b>           |                                |                                         |       |
| Multidrug resistance                              | 0/10 (0)                       | 1/25 (4)                                | >0.99 |
| Resistance to isoniazid                           | 2/10 (20)                      | 2/25 (8)                                | 0.56  |
| Resistance to rifampin                            | 0/10 (0)                       | 1/25 (4)                                | >0.99 |
| Resistance to ethambutol                          | 1/10 (10)                      | 2/25 (8)                                | >0.99 |
| Resistance to pyrazinamide                        | 0/10 (0)                       | 1/25 (4)                                | >0.99 |

|                                                                                           |                |                      |        |
|-------------------------------------------------------------------------------------------|----------------|----------------------|--------|
| Resistance to FQ                                                                          | 0/10 (0)       | 1/25 (4)             | >0.99  |
| <b>Time from mycobacterial test to positive mycobacterial culture, median weeks (IQR)</b> | 6.8 (5.2-8.9)  | 5.1 (4.0-6.9)        | 0.42   |
| <b>Time from mycobacterial test to anti-TB therapy, median weeks (IQR)</b>                | 8.7 (7.1-13.9) | 5.4 (4.6-8.6)        | 0.02   |
| <b>Treatment</b>                                                                          |                |                      |        |
| Definitive anti-TB treatment <sup>d</sup>                                                 | 8 (53)         | 23 (55)              | 0.92   |
| Defaulted from anti-TB treatment <sup>e</sup>                                             | 4 (27)         | 7 (17)               | 0.46   |
| Change of treatment regimen                                                               | 1 (7)          | 0 (0)                | 0.26   |
| AG exposure prior to TB diagnosis <sup>f</sup>                                            | 1 (7)          | 1 (2)                | 0.46   |
| Duration of FQ use, median days (IQR)                                                     | 18 (14-19)     | 2 (1-3) <sup>g</sup> | <0.001 |
| <b>Outcome</b>                                                                            |                |                      |        |
| Death before availability of positive mycobacterial culture                               | 3 (20)         | 12 (29)              | 0.74   |
| 30-day all-cause mortality                                                                | 2 (13)         | 7 (17)               | >0.99  |
| 90-day all-cause mortality                                                                | 2 (13)         | 13 (31)              | 0.31   |

**NOTE.** Data are no. (%) of patients unless indicated otherwise. AG, aminoglycoside; FQ, fluoroquinolone; HIV, human immunodeficiency virus; IQR, interquartile range; SD, standard deviation; TB, tuberculosis.

<sup>a</sup> 10 (67%) were exposed to levofloxacin alone. In addition, 3 (20%) were exposed to ciprofloxacin and levofloxacin, and 2 (13%) were exposed to levofloxacin and moxifloxacin.

<sup>b</sup> The comparator included the short-term FQ group (n=6), non-FQ group (n=15), and no antibiotics (n=21).

<sup>c</sup> 6 patients (2 in the long-term FQ group and 4 in the comparator) had extrapulmonary manifestations of TB only.

<sup>d</sup> 15 patients (3 in the long-term FQ group and 12 in the comparator) died before the availability of a positive mycobacterial culture, and 11 patients (4 in the long-term FQ group and 7 in the comparator) defaulted from anti-TB treatment.

<sup>e</sup> Defined as treatment interruption for any reason.

<sup>f</sup> No patients received AG for more than 7 days prior to TB diagnosis.

<sup>g</sup> 6 (14%) patients in the comparator received FQ (< 7 days) prior to anti-TB treatment.

**SUPPLEMENTAL TABLE 3.** Univariate analysis of risk factors associated with 30-day mortality among the 57 immunocompromised patients who did not received empirical anti-TB treatment (missed TB group)

| Variables                                                      | Died<br>(n = 9) | Survived<br>(n = 48) | OR (95% CI)       | P     |
|----------------------------------------------------------------|-----------------|----------------------|-------------------|-------|
| <b>Demographics</b>                                            |                 |                      |                   |       |
| Age, mean years $\pm$ SD                                       | 63 $\pm$ 12     | 65 $\pm$ 13          | 0.99 (0.94-1.05)  | 0.70  |
| Male sex                                                       | 6 (67)          | 31 (65)              | 1.10 (0.24-4.95)  | >0.99 |
| <b>Clinical diagnosis</b>                                      |                 |                      |                   |       |
| Pulmonary TB                                                   | 9 (100)         | 42 (88)              | NA                | 0.58  |
| Extrapulmonary TB                                              | 0 (0)           | 6 (13)               | NA                | 0.58  |
| Disseminated TB                                                | 0 (0)           | 0 (0)                | NA                | NA    |
| <b>Underlying disease</b>                                      |                 |                      |                   |       |
| Solid tumor                                                    | 4 (44)          | 42 (88)              | 0.11 (0.02-0.55)  | 0.01  |
| Transplantation                                                | 0 (0)           | 3 (6)                | NA                | >0.99 |
| Hematologic malignancy                                         | 2 (22)          | 2 (4)                | 6.57 (0.79-54.48) | 0.11  |
| Chronic renal failure                                          | 0 (0)           | 1 (2)                | NA                | >0.99 |
| Liver cirrhosis                                                | 2 (22)          | 5 (10)               | 2.46 (0.40-15.23) | 0.30  |
| Connective tissue disease                                      | 1 (11)          | 3 (6)                | 1.88 (0.17-20.36) | 0.51  |
| HIV infection                                                  | 0 (0)           | 0 (0)                | NA                | NA    |
| <b>Immunosuppressive agent use (<math>\leq</math> 1 month)</b> | 6 (67)          | 12 (25)              | 6.00 (1.30-27.77) | 0.02  |
| <b>Atypical chest image<sup>a</sup></b>                        | 7/9 (78)        | 33/42 (79)           | 0.98 (0.17-5.59)  | >0.99 |
| <b>Anti-TB drug susceptibility test</b>                        | 2 (22)          | 33 (69)              | 0.13 (0.02-0.70)  | 0.02  |
| Multidrug resistance                                           | 0/2 (0)         | 1/33 (3)             | NA                | >0.99 |
| Resistance to isoniazid                                        | 0/2 (0)         | 4/33 (12)            | NA                | >0.99 |
| Resistance to rifampin                                         | 0/2 (0)         | 1/33 (3)             | NA                | >0.99 |
| Resistance to ethambutol                                       | 0/2 (0)         | 3/33 (9)             | NA                | >0.99 |
| Resistance to pyrazinamide                                     | 0/2 (0)         | 1/33 (3)             | NA                | >0.99 |
| Resistance to FQ                                               | 0/2 (0)         | 1/33 (3)             | NA                | >0.99 |

**Time from mycobacterial test to positive**

|                                                  |               |               |                  |      |
|--------------------------------------------------|---------------|---------------|------------------|------|
| <b>mycobacterial culture, median weeks (IQR)</b> | 5.6 (4.3-8.3) | 6.8 (4.8-8.6) | 0.86 (0.60-1.23) | 0.51 |
|--------------------------------------------------|---------------|---------------|------------------|------|

**Time from mycobacterial test to anti-TB**

|                                    |    |               |    |    |
|------------------------------------|----|---------------|----|----|
| <b>therapy, median weeks (IQR)</b> | NA | 5.9 (4.7-9.4) | NA | NA |
|------------------------------------|----|---------------|----|----|

**Treatment**

|                                  |        |         |                               |        |
|----------------------------------|--------|---------|-------------------------------|--------|
| Definitive anti-TB treatment     | 0 (0)  | 31 (65) | NA                            | <0.001 |
| Defaulted from anti-TB treatment | 0 (0)  | 11 (23) | NA                            | 0.18   |
| Change of treatment regimen      | 0 (0)  | 1 (2)   | NA                            | >0.99  |
| AG use                           | 0 (0)  | 2 (4)   | NA                            | >0.99  |
| FQ use                           | 6 (67) | 15 (31) | 4.40 (0.97-20.00)             | 0.06   |
| Short-term FQ use (< 7 days)     | 4 (44) | 2 (4)   | 18.40 (2.67-127.03)           | 0.004  |
| Long-term FQ use (≥ 7 days)      | 2 (22) | 13 (27) | 0.77 (0.14-4.19)              | >0.99  |
| Duration of FQ use               | NA     | NA      | 0.85 <sup>b</sup> (0.73-0.99) | 0.04   |
| Non-FQ use                       | 3 (33) | 12 (25) | 1.50 (0.32-6.94)              | 0.69   |
| Short-term non-FQ use (< 7 days) | 1 (11) | 6 (13)  | 0.88 (0.09-8.29)              | >0.99  |
| Non-FQ use (≥ 7 days)            | 2 (22) | 6 (13)  | 2.00 (0.33-11.97)             | 0.60   |
| No antibiotic use                | 0 (0)  | 21 (44) | NA                            | 0.02   |

---

**NOTE.** Data are no. (%) of patients unless indicated otherwise. AG, aminoglycoside; CI, confidence interval; FQ, fluoroquinolone; HIV, human immunodeficiency virus; IQR, interquartile range; NA, not available; OR, odds ratio; SD, standard deviation; TB, tuberculosis.

<sup>a</sup> 6 patients among those who survived had extrapulmonary manifestations of TB only.

<sup>b</sup> The odds ratio for the duration of FQ use indicates that for every additional one day there is a 0.85 times lower risk of mortality in the patients (n=21) who received FQs.

**SUPPLEMENTAL TABLE 4.** Univariate analysis of risk factors associated with 30-day mortality excluding subjects who died within 3 days after antibiotic use

| Variables                                      | Died<br>(n = 7) | Survived<br>(n = 182) | OR (95% CI)       | P     |
|------------------------------------------------|-----------------|-----------------------|-------------------|-------|
| <b>Demographics</b>                            |                 |                       |                   |       |
| Age, mean years ± SD                           | 60 ± 13         | 61 ± 15               | 1.00 (0.95-1.05)  | 0.89  |
| Male sex                                       | 5 (71)          | 132 (73)              | 0.95 (0.18-5.04)  | >0.99 |
| <b>Clinical diagnosis</b>                      |                 |                       |                   |       |
| Pulmonary TB                                   | 7 (100)         | 148 (81)              | NA                | 0.36  |
| Extrapulmonary TB                              | 0 (0)           | 23 (13)               | NA                | 0.60  |
| Disseminated TB                                | 0 (0)           | 11 (6)                | NA                | >0.99 |
| <b>Underlying disease</b>                      |                 |                       |                   |       |
| Solid tumor                                    | 3 (43)          | 119 (65)              | 0.40 (0.09-1.83)  | 0.25  |
| Transplantation                                | 0 (0)           | 13 (7)                | NA                | >0.99 |
| Hematologic malignancy                         | 1 (14)          | 12 (7)                | 2.36 (0.26-21.23) | 0.40  |
| Chronic renal failure                          | 0 (0)           | 20 (11)               | NA                | >0.99 |
| Liver cirrhosis                                | 2 (29)          | 9 (5)                 | 7.69 (1.31-45.21) | 0.06  |
| Connective tissue disease                      | 1 (14)          | 15 (8)                | 1.86 (0.21-16.45) | 0.47  |
| HIV infection                                  | 0 (0)           | 1 (1)                 | NA                | >0.99 |
| <b>Immunosuppressive agent use (≤ 1 month)</b> | 4 (57)          | 60 (33)               | 2.71 (0.59-12.50) | 0.23  |
| <b>Atypical chest image<sup>a</sup></b>        | 4/7 (57)        | 78/157 (50)           | 1.35 (0.29-6.23)  | >0.99 |
| <b>Anti-TB drug susceptibility test</b>        | 1 (14)          | 146 (80)              | 0.04 (0.01-0.35)  | 0.001 |
| Multidrug resistance                           | 0/1 (0)         | 3/146 (2)             | NA                | >0.99 |
| Resistance to isoniazid                        | 0/1 (0)         | 9/146 (6)             | NA                | >0.99 |
| Resistance to rifampin                         | 0/1 (0)         | 2/146 (1)             | NA                | >0.99 |
| Resistance to ethambutol                       | 0/1 (0)         | 5/146 (3)             | NA                | >0.99 |
| Resistance to pyrazinamide                     | 0/1 (0)         | 1/146 (1)             | NA                | >0.99 |
| Resistance to FQ                               | 0/1 (0)         | 3/146 (2)             | NA                | >0.99 |

|                                                                                           |                |               |                               |        |
|-------------------------------------------------------------------------------------------|----------------|---------------|-------------------------------|--------|
| <b>Time from mycobacterial test to positive mycobacterial culture, median weeks (IQR)</b> | 7.7 (5.0-10.4) | 7.6 (5.1-8.6) | 1.14 (0.57-2.25)              | 0.51   |
| <b>Time from mycobacterial test to anti-TB therapy, median weeks (IQR)</b>                | 1.0 (0.6-1.3)  | 3.0 (1.0-4.6) | 0.56 (0.19-1.66)              | 0.26   |
| <b>Treatment</b>                                                                          |                |               |                               |        |
| Empirical anti-TB treatment                                                               | 2 (29)         | 134 (74)      | 0.14 (0.03-0.76)              | 0.02   |
| Definitive anti-TB treatment                                                              | 2 (29)         | 165 (91)      | 0.04 (0.01-0.23)              | <0.001 |
| Defaulted from anti-TB treatment                                                          | 0 (0)          | 11 (6)        | NA                            | >0.99  |
| Change of treatment regimen                                                               | 0 (0)          | 13 (7)        | NA                            | >0.99  |
| AG use                                                                                    | 0 (0)          | 5 (3)         | NA                            | >0.99  |
| FQ use                                                                                    | 4 (57)         | 48 (26)       | 3.72 (0.80-17.24)             | 0.09   |
| Short-term FQ use (< 7 days)                                                              | 2 (29)         | 17 (9)        | 3.88 (0.70-21.55)             | 0.15   |
| Long-term FQ use (≥ 7 days)                                                               | 2 (29)         | 31 (17)       | 1.95 (0.36-10.50)             | 0.35   |
| Duration of FQ use                                                                        | NA             | NA            | 0.98 <sup>b</sup> (0.87-1.10) | 0.72   |
| Non-FQ use                                                                                | 3 (43)         | 74 (41)       | 1.10 (0.24-5.03)              | >0.99  |
| Short-term non-FQ use (< 7 days)                                                          | 0 (0)          | 29 (16)       | NA                            | 0.60   |
| Non-FQ use (≥ 7 days)                                                                     | 3 (43)         | 45 (25)       | 2.28 (0.49-10.59)             | 0.37   |
| No antibiotic use                                                                         | 0 (0)          | 60 (33)       | NA                            | 0.10   |

**NOTE.** Data are no. (%) of patients unless indicated otherwise. AG, aminoglycoside; CI, confidence interval; FQ, fluoroquinolone; HIV, human immunodeficiency virus; IQR, interquartile range; NA, not available; OR, odds ratio; SD, standard deviation; TB, tuberculosis.

<sup>a</sup> 23 patients among those who survived had extrapulmonary manifestations of TB only. Of 11 patients with disseminated TB in the survival group, 9 had pulmonary plus extrapulmonary manifestations of TB and 2 had extrapulmonary manifestations of TB only.

<sup>b</sup> The odds ratio for the duration of FQ use indicates that for every additional one day there is a 0.98 times lower risk of mortality in the patients (n=52) who received FQs.



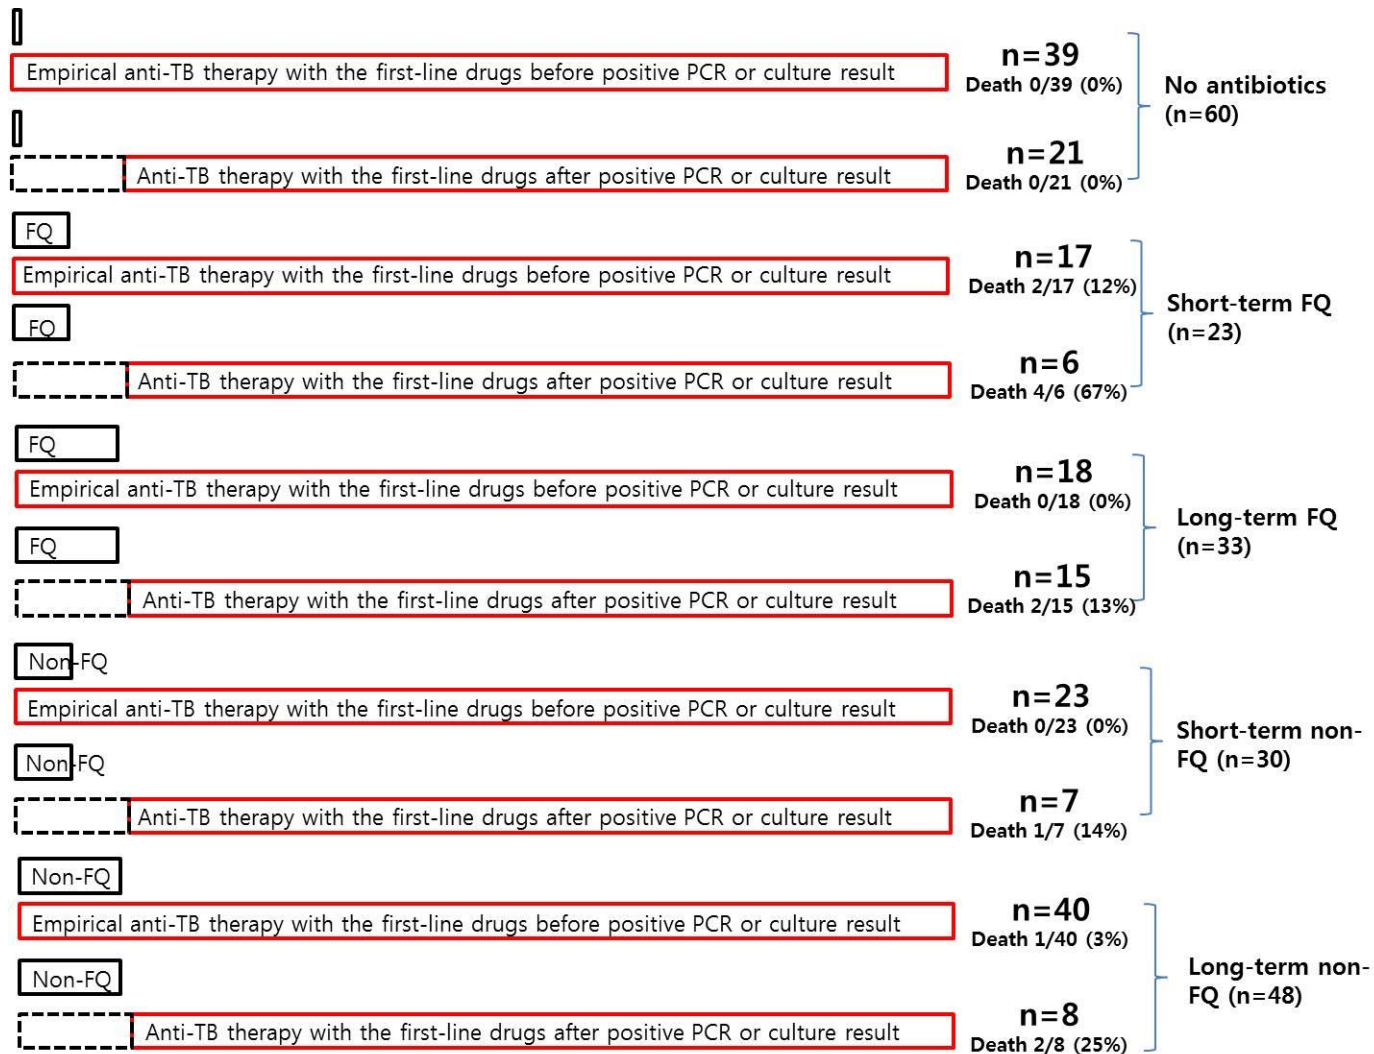

**SUPPLEMENTAL FIG 1.** Stratified analysis according to FQ use and empirical anti-TB therapy
